# Supplementary material
Source: ML conference proceedings conference paper supplement (https://openaccess.thecvf.com/content/CVPR_2019/html/Abolghasemi_Pay_Attention_-_CVPR_2019_paper.html)
Supplement: Supplementary file 1 [file Abolghasemi_Pay_Attention_-_CVPR_2019_supplemental.zip]

Archive with 3 entries (3 files):
- 1920-supp.pdf
- cvpr.mp4
- README
