# Supplementary material
Source: ML conference proceedings conference paper supplement (https://openaccess.thecvf.com/content/CVPR_2019/html/Abolghasemi_Pay_Attention_-_CVPR_2019_paper.html)
Supplement: Supplementary file 1 [file Abolghasemi_Pay_Attention_-_CVPR_2019_supplemental.zip › README]

Codec used: DivX H.264
Link To Download: https://www.divx.com/en/software/technologies/h264
